# Supplementary material for: Identifying SETBP1 haploinsufficiency molecular pathways to improve patient diagnosis using induced pluripotent stem cells and neural disease modelling
Source: PubMed Central journal article supplement (PMC11443744; doi:10.1186/s13229-024-00625-1), 2024-09-30
Supplement: 13229_2024_625_MOESM1_ESM.pdf [file 13229_2024_625_MOESM1_ESM.pdf]

# SETBP1 Analysis Script

Kevin Chen

February 12, 2024

## Contents

|          |                                              |           |
|----------|----------------------------------------------|-----------|
| <b>1</b> | <b>Preparation</b>                           | <b>1</b>  |
| <b>2</b> | <b>Processing DGE object</b>                 | <b>2</b>  |
| <b>3</b> | <b>Construction of the PCA plot</b>          | <b>5</b>  |
| <b>4</b> | <b>Differential gene expression analysis</b> | <b>6</b>  |
| <b>5</b> | <b>Gene Set Enrichment Analysis (GSEA)</b>   | <b>7</b>  |
| <b>6</b> | <b>Construction of GSEA dotplots</b>         | <b>12</b> |
| <b>7</b> | <b>Construction of GSEA plots</b>            | <b>21</b> |
| <b>8</b> | <b>Session info</b>                          | <b>26</b> |

This file contains the R analysis script used to generate the data and figures for the paper “Identifying SETBP1 haploinsufficiency molecular pathways to improve patient diagnosis using induced pluripotent stem cells and neural disease modelling.” The script describes the steps performed after Kallisto transcript quantification.

The following sections were each run interactively.

## 1 Preparation

Beginning with preparing the quantification files.

Loading libraries.

```
library(pacman)
```

```
p_load(ggrepel,  
      tximport,  
      readr,  
      RColorBrewer,  
      tidyverse,  
      GGally,  
      limma,  
      edgeR,
```

```

org.Hs.eg.db,
viridis,
ComplexUpset,
DOSE,
enrichplot,
clusterProfiler,
patchwork)

```

Reading in paths to Kallisto files and sample metadata

```

x <- read_csv("./sample_abundance_files.h5", col_names = FALSE) %>%
  #This csv contains paths to the abundance files
  rename(path = 1) %>%
  mutate(Sequencing_ID = (path %>% str_remove_all("Kallisto/|/abundance.h5")))

meta_SETBP1_raw <- read_csv("./sample_metadata/SETBP1_RNAseq_samples.csv") # metadata

meta_SETBP1 <- meta_SETBP1_raw %>%
  mutate(Sequencing_ID = str_replace_all(`Sample Name`, " |_|[.]", "-")) %>%
  dplyr::rename(cell_type = `Cell type`) %>%
  select(!`Sample Name`)

```

Preparing DGE object.

```

tx2gene <- read.csv("tx2gene_entrez.csv", header = FALSE)

kallisto_all_samples <- tximport(meta_combined_path$path,
  type = "kallisto",
  tx2gene = tx2gene,
  countsFromAbundance = "lengthScaledTPM",
  ignoreAfterBar = TRUE)

DGE <- DGEList(kallisto_all_samples$counts)
DGE$samples <- bind_cols(DGE$samples, meta_SETBP1)
DGE$genes <- bitr(geneID = rownames(DGE),
  fromType = "ENTREZID",
  toType = "SYMBOL",
  OrgDb = org.Hs.eg.db,
  drop = FALSE)

colnames(DGE$genes) <- c("GeneID", "Symbol")

```

## 2 Processing DGE object

The DGE object contains the counts data that we will use for analysis. We need to perform processing (filtering/normalization) first.

Filtering of counts data

```
keep.exprs <- filterByExpr(DGE, group = DGE$samples$merged_group)
DGE_filtered <- DGE[keep.exprs, keep.lib.sizes = FALSE]
```

Visualise the results:

```
L <- mean(DGE$samples$lib.size) * 1e-6
M <- median(DGE$samples$lib.size) * 1e-6

cpm <- cpm(DGE)
lcpm <- cpm(DGE, log = T)

lcpm.cutoff <- log2(10/M + 2/L)
nsamples <- ncol(DGE)

col <- inferno(n = nsamples, direction = -1)

par(mfrow=c(1,2))

plot(density(lcpm[,1]),
     col=col[1],
     lwd=2,
     ylim=c(0,0.26),
     las=2,
     main="",
     xlab="")
title(main="A. Raw data", xlab="Log-cpm")

abline(v=lcpm.cutoff, lty=3)
for (i in 2:nsamples){
  den <- density(lcpm[,i])
  lines(den$x, den$y, col=col[i], lwd=2)
}
lcpm <- cpm(DGE_filtered,
           log=TRUE)
plot(density(lcpm[,1]),
     col=col[1],
     lwd=2,
     ylim=c(0,0.26),
     las=2,
     main="",
     xlab="")
title(main="B. Filtered data", xlab="Log-cpm")
abline(v=lcpm.cutoff, lty=3)
for (i in 2:nsamples){
  den <- density(lcpm[,i])
  lines(den$x, den$y, col=col[i], lwd=2)
}
```

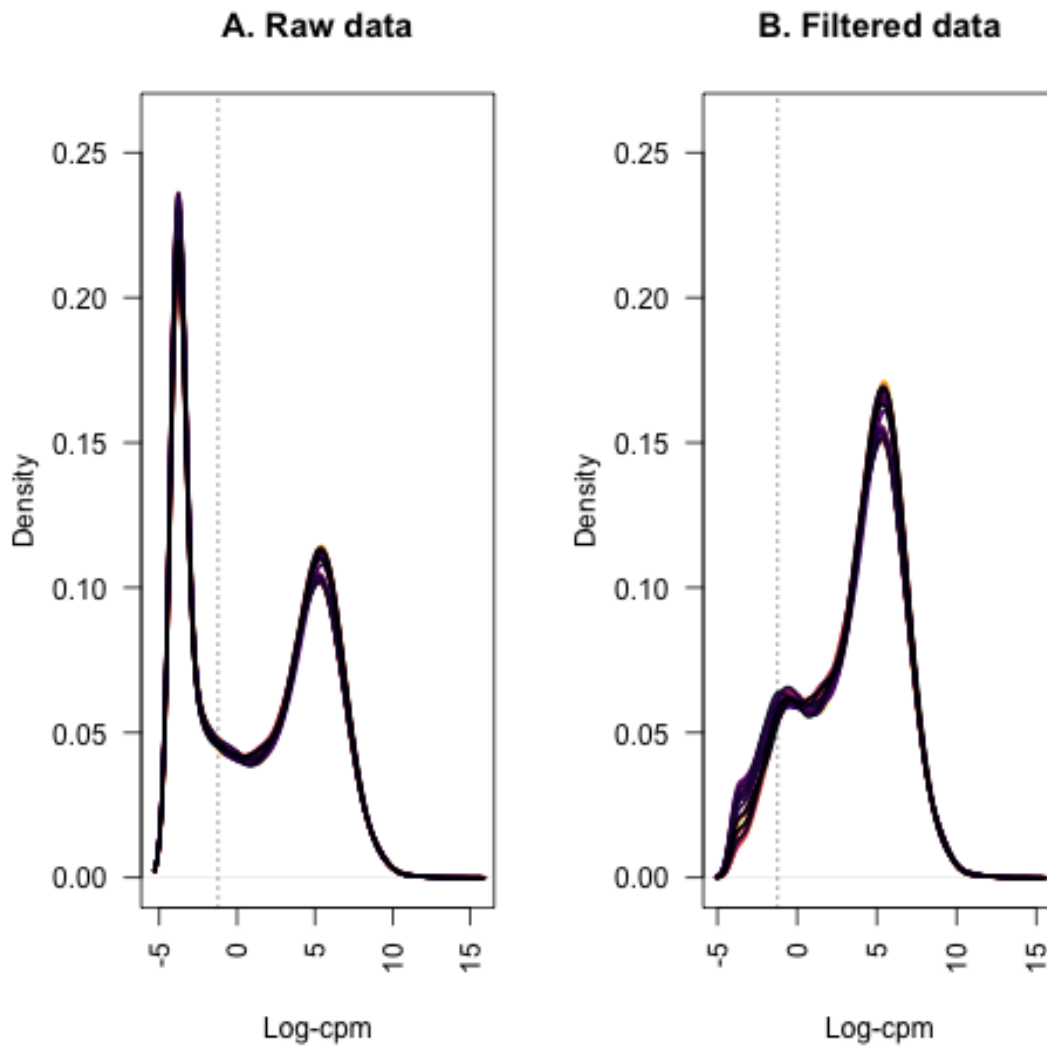

```
DGE_filtered_normalised <- calcNormFactors(DGE_filtered, method = "TMM")
```

```
par(mfrow=c(1,2))
lcpm <- cpm(DGE_filtered, log=TRUE)
boxplot(lcpm, las=2, main="")
title(main="A. Example: Unnormalised data",ylab="Log-cpm")
lcpm <- cpm(DGE_filtered_normalised, log=TRUE)
boxplot(lcpm, las=2, main="")
title(main="B. Example: Normalised data",ylab="Log-cpm")
```

**A. Example: Unnormalised data**

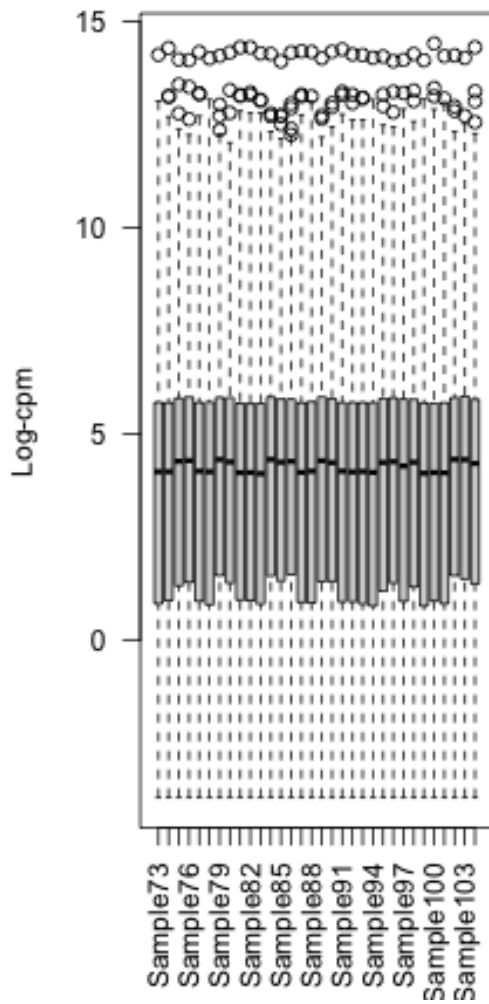

**B. Example: Normalised data**

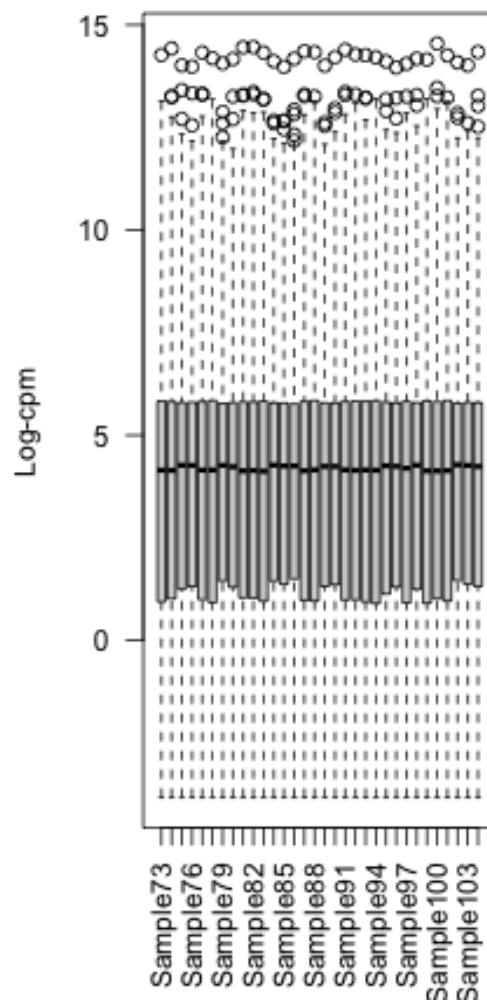

### 3 Construction of the PCA plot

Following section contains the code required to construct Fig. 3A.

```
lcpm <- cpm(DGE_filtered_normalised, log = T)

col.exp <- DGE_filtered_normalised$samples$cell_type

mds <- plotMDS(lcpm)

toplot <- data.frame(Dim1 = mds$x, Dim2 = mds$y,
                    Group = col.exp)

p <- ggplot(toplot, aes(Dim1, Dim2, colour = col.exp)) +
  geom_point(size = 3) +
```

```
xlab("PC1 (54.3%)") +
ylab("PC2 (15.4%)") +
scale_colour_manual(values = c("blue", "red"),
                    name = "Cell type") +
theme(axis.title = element_text(size = 12),
      legend.title = element_text(size = 16),
      legend.text = element_text(size = 12))
```

p

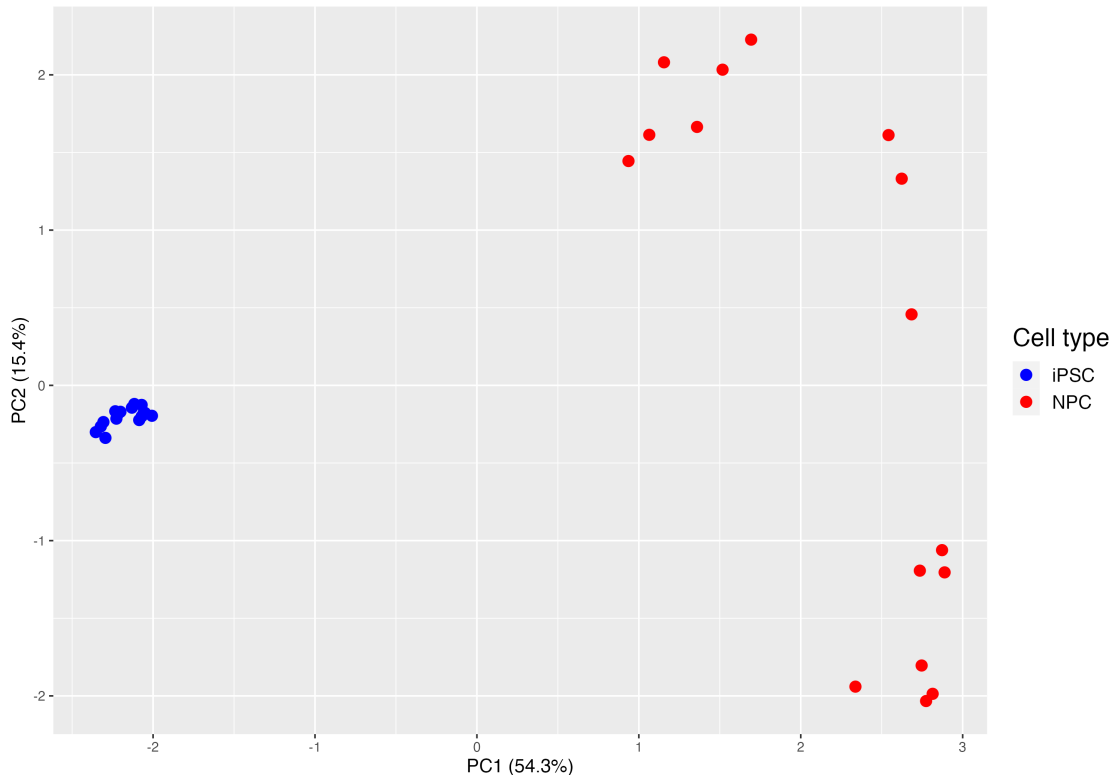

## 4 Differential gene expression analysis

Perform the DEG analysis. We are interested in the logFC/expression data of the genes in NPCs vs. iPSCs, PATH2 vs. PATH3. vs. VUS2. vs. WT, etc. For example, do we see that markers of neural differentiation are indeed upregulated in the NPCs compared to the iPSCs?

```
# Prepare the experimental design
```

```
design <- stats::model.matrix(data = DGE_filtered_normalised$samples, ~0 + merged_group)
colnames(design) <- str_remove_all(colnames(design), "merged_group") # bit of simplification
```

```
# Construct the voom object
```

```
v <- voom(DGE.SETBP1.filtered.normalised, design, plot=TRUE)
```

```
# Prepare the contrast matrix. Difference of differences was not used in the final paper.
```

```

contrast.matrix <- makeContrasts(
  # differentiation
  WT_differentiation = "NPC_WT - iPSC_WT",
  PATH2_differentiation = "NPC_path2 - iPSC_path2",
  PATH3_differentiation = "NPC_path3 - iPSC_path3",
  VUS2_differentiation = "NPC_vus2 - iPSC_vus2",
  # difference between NPCs
  VUS2_WT_NPCcomparison = "NPC_vus2 - NPC_WT",
  PATH2_WT_NPCcomparison = "NPC_path2 - NPC_WT",
  PATH3_WT_NPCcomparison = "NPC_path3 - NPC_WT",
  # difference of differences
  VUS2_DifferenceofDifferences = "(NPC_vus2 - iPSC_vus2) - (NPC_WT - iPSC_WT)",
  PATH2_DifferenceofDifferences = "(NPC_path2 - iPSC_path2) - (NPC_WT - iPSC_WT)",
  PATH3_DifferenceofDifferences = "(NPC_path3 - iPSC_path3) - (NPC_WT - iPSC_WT)",

  levels = colnames(design))

# Perform the linear modelling

vfit <- lmFit(v, design)
vfit <- contrasts.fit(vfit, contrasts = contrast.matrix)

fit <- treat(vfit, lfc = 0.5)

```

Generate logFC lists for use in R. The output can also be saved/exported.

```

contrasts <- colnames(contrast.matrix)

generateFCdata <- function(x){

SETBP1.logFC.data <- list()

  top <- topTreat(fit, coef = x, number = Inf) %>%
    arrange(desc(logFC)) %>%
    list

  SETBP1.data <- append(SETBP1.logFC.data, top)
}

SETBP1.logFC.data <- sapply(contrasts, generateFCdata)

```

## 5 Gene Set Enrichment Analysis (GSEA)

Start by preparing input lists for GSEA. This involves generating the ranked list of genes based on their logFC. In GSEA, we are interested in seeing if particular gene lists (e.g. genes associated with neurodevelopment, neurons, etc.) tend to be represented at the bottom/top of a list. Here, we

are interested in seeing if we can capture enrichments of terms that might be relevant to SETBP1 haploinsufficiency disorder to better understand the biological effects of the p.Thr1387Met (VUS2) variant.

```
GSEA.rank <- function(x){  
  
  genelists <- list()  
  
  top <- topTreat(fit = fit, coef = x, number = Inf) %>%  
    arrange(desc(logFC))  
  
  gc <- top$logFC  
  names(gc) <- top$GeneID # changed  
  
  genelist <- append(genelists, list(gc))  
  
}  
  
GSEA.lists <- sapply(contrasts, GSEA.rank)
```

Perform GSEA using all GO ontologies, DisGeNET (DGN), and Disease Ontology (DO).

```
SETBP1.DGN.unfiltered <- compareCluster(geneClusters = GSEA.lists,  
  fun = "gseDGN",  
  pvalueCutoff = 1,  
  pAdjustMethod = "BH",  
  nPermSimple = 10000,  
  seed = 42) %>%  
  setReadable("org.Hs.eg.db",  
    keyType = "ENTREZID")  
  
SETBP1.DO.unfiltered <- compareCluster(fun = "gseDO",  
  geneClusters = GSEA.lists,  
  pvalueCutoff = 1,  
  pAdjustMethod = "BH",  
  eps = 0,  
  nPermSimple = 10000,  
  seed = 42) %>%  
  setReadable(OrgDb = org.Hs.eg.db,  
    keyType = "ENTREZID")  
  
SETBP1.GO.BP.unfiltered <- compareCluster(fun = "gseGO",  
  geneClusters = GSEA.lists,  
  pvalueCutoff = 1,  
  pAdjustMethod = "BH",  
  OrgDb = "org.Hs.eg.db",  
  seed = 42,  
  eps = 0,
```



```

nPermSimple = 10000,
ont = "BP") %>%
setReadable(OrgDb = "org.Hs.eg.db")

SETBP1.GO.MF.unfiltered <- compareCluster(fun = "gseGO",
geneClusters = GSEA.lists,
pvalueCutoff = 1,
pAdjustMethod = "BH",
OrgDb = "org.Hs.eg.db",
seed = 42,
eps = 0,
nPermSimple = 10000,
ont = "MF") %>%
setReadable(OrgDb = "org.Hs.eg.db")

SETBP1.GO.CC.unfiltered <- compareCluster(fun = "gseGO",
geneClusters = GSEA.lists,
pvalueCutoff = 1,
pAdjustMethod = "BH",
OrgDb = "org.Hs.eg.db",
seed = 42,
eps = 0,
nPermSimple = 10000,
ont = "CC") %>%
setReadable(OrgDb = "org.Hs.eg.db")

```

Save these results.

```

separate.DGN.enrichment <- function(x){
temp <- SETBP1.DGN.unfiltered@compareClusterResult %>%
filter(Cluster == x) %>%
select(!Cluster)

if(x %in% contrasts.diff){
write_csv(temp, paste0("./results/results_correctedgenesymbols_23May/SETBP1/gsea_analyses/Di
x,
"_allDisGeNET.csv"),
col_names = TRUE)
}
if(x %in% contrasts.NPCdiff){
write_csv(temp, paste0("./results/results_correctedgenesymbols_23May/SETBP1/gsea_analyses/Di
x,
"_allDisGeNET.csv"),
col_names = TRUE)
}
if(x %in% contrasts.diffofdifff){
write_csv(temp, paste0("./results/results_correctedgenesymbols_23May/SETBP1/gsea_analyses/Di
x,

```

```

        "_allDisGeNET.csv"),
        col_names = TRUE)
    }
}

map(contrasts, separate.DGN.enrichment)

separate.GO.BP.enrichment <- function(x){
  temp <- SETBP1.GO.BP.unfiltered@compareClusterResult %>%
    filter(Cluster == x) %>%
    select(!Cluster)

  if(x %in% contrasts.diff){
    write_csv(temp,
              paste0("./results/results_correctedgenesymbols_23May/SETBP1/gsea_analyses/GO_terms
    )
  }
  if(x %in% contrasts.NPCdiff){
    write_csv(temp,
              paste0("./results/results_correctedgenesymbols_23May/SETBP1/gsea_analyses/GO_terms
  )
  }
  if(x %in% contrasts.diffofdiffer){
    write_csv(temp,
              paste0("./results/results_correctedgenesymbols_23May/SETBP1/gsea_analyses/GO_terms
  )
  }
}

map(contrasts, separate.GO.BP.enrichment)

separate.GO.MF.enrichment <- function(x){
  temp <- SETBP1.GO.MF.unfiltered@compareClusterResult %>%
    filter(Cluster == x) %>%
    select(!Cluster)

  if(x %in% contrasts.diff){
    write_csv(temp,
              paste0("./results/results_correctedgenesymbols_23May/SETBP1/gsea_analyses/GO_terms
  )
  }
  if(x %in% contrasts.NPCdiff){
    write_csv(temp,
              paste0("./results/results_correctedgenesymbols_23May/SETBP1/gsea_analyses/GO_terms
  )
  }
  if(x %in% contrasts.diffofdiffer){
    write_csv(temp,
              paste0("./results/results_correctedgenesymbols_23May/SETBP1/gsea_analyses/GO_terms
  )
  }
}

map(contrasts, separate.GO.MF.enrichment)

```

```

separate.GO.CC.enrichment <- function(x){
  temp <- SETBP1.GO.CC.unfiltered@compareClusterResult %>%
    filter(Cluster == x) %>%
    select(!Cluster)

  if(x %in% contrasts.diff){
    write_csv(temp,
              paste0("./results/results_correctedgenesymbols_23May/SETBP1/gsea_analyses/GO_terms",
                     x,
                     "_allGO_CC.csv"),
              col_names = TRUE)
  }
  if(x %in% contrasts.NPCdiff){
    write_csv(temp,
              paste0("./results/results_correctedgenesymbols_23May/SETBP1/gsea_analyses/GO_terms",
                     x,
                     "_allGO_CC.csv"),
              col_names = TRUE)
  }
  if(x %in% contrasts.diffofdiffer){
    write_csv(temp,
              paste0("./results/results_correctedgenesymbols_23May/SETBP1/gsea_analyses/GO_terms",
                     x,
                     "_allGO_CC.csv"),
              col_names = TRUE)
  }
}

map(contrasts, separate.GO.CC.enrichment)

separate.DO.enrichment <- function(x){
  temp <- SETBP1.DO.unfiltered@compareClusterResult %>%
    filter(Cluster == x) %>%
    select(!Cluster)

  if(x %in% contrasts.diff){
    write_csv(temp,
              paste0("./results/results_correctedgenesymbols_23May/SETBP1/gsea_analyses/DO_terms",
                     x,
                     "_allDO.csv"),
              col_names = TRUE)
  }
  if(x %in% contrasts.NPCdiff){
    write_csv(temp,
              paste0("./results/results_correctedgenesymbols_23May/SETBP1/gsea_analyses/DO_terms",
                     x,
                     "_allDO.csv"),
              col_names = TRUE)
  }
  if(x %in% contrasts.diffofdiffer){
    write_csv(temp,
              paste0("./results/results_correctedgenesymbols_23May/SETBP1/gsea_analyses/DO_terms",
                     x,
                     "_allDO.csv"),
              col_names = TRUE)
  }
}

```

```

write_csv(temp,
          paste0("./results/results_correctedgenesymbols_23May/SETBP1/gsea_analyses/DO_terms",
                x,
                "_allDO.csv"),
          col_names = TRUE)
}
}

map(contrasts, separate.DO.enrichment)

```

## 6 Construction of GSEA dotplots

Figures 4 and 5(A-C) contain dotplots depicting results from GSEA. The following section contains the code used to produce these dotplots. The dotplots depict significant enrichments from the GSE, with colour representing the normalised enrichment score, i.e. the direction of the enrichment (do genes tend to be overexpressed or underexpressed?)

For these dotplots, a specified list of terms was provided. These terms are those which are relevant to SETBP1-HD.

Before dotplot construction, some processing was performed to rename the clusters. The resultant dataframes differ from those in the original results in that:

- the Cluster name is simplified
- only difference between NPC results are included (the underlying data is not changed)

This processing is performed below:

```

# Retrieve original results for only difference between NPCs

sapply(c("DisGeNET_terms", "DO_terms"), function(x){

files <- list.files(paste0("./results/results_correctedgenesymbols_23May/SETBP1/gsea_analyses/",
                          x,
                          "/differences_between_NPCs/"),
                  pattern = ".csv",
                  full.names = TRUE)

name <- str_replace_all(x, "_terms", "_files")

assign(x = name,
       value = files,
       envir = .GlobalEnv)
})

sapply(c("biological_process", "cellular_component", "molecular_function"), function(x){

files <- list.files(paste0("./results/results_correctedgenesymbols_23May/SETBP1/gsea_analyses/GO",
                          x,
                          "/differences_between_NPCs/"),

```

```

        pattern = ".csv",
        full.names = TRUE)

name <- paste0(x, "_files")

assign(x = name,
      value = files,
      envir = .GlobalEnv)
})

names <- c("PATH2",
          "PATH3",
          "VUS2")

# perform renaming

biological_process_df <- data.frame(path = biological_process_files,
                                   name = names)
cellular_component_df <- data.frame(path = cellular_component_files,
                                   name = names)
molecular_function_df <- data.frame(path = molecular_function_files,
                                   name = names)
DisGeNET_function_df <- data.frame(path = DisGeNET_files,
                                   name = names)
DO_df <- data.frame(path = DO_files,
                   name = names)

# Perform the processing

process_csv <- function(path, pattern){
  read_csv(path) %>%
  mutate(Cluster = pattern) %>%
  dplyr::select(Cluster, everything())
}

dfs <- ls(pattern = "_df$")

DGN_results <- map2_df(DisGeNET_function_df$path, DisGeNET_function_df$name, process_csv)
DO_results <- map2_df(DO_df$path, DO_df$name, process_csv)
GO_MF_results <- map2_df(molecular_function_df$path, molecular_function_df$name, process_csv)
GO_BP_results <- map2_df(biological_process_df$path, biological_process_df$name, process_csv)
GO_CC_results <- map2_df(cellular_component_df$path, cellular_component_df$name, process_csv)

```

```
# Create a dummy compareCluster object
```

```
ck <- compareCluster(geneClusters = GSEA.lists[5:7],  
                    fun = "gseD0")
```

The following code section refers to the construction of the dotplot.

```
# Begin by reading in the list of terms
```

```
files <- list.files("./rnaseq_R_code/SETBP1/2024_02_05_FinaliseDotplots/InputLists/",  
                  pattern = ".csv",  
                  full.names = TRUE)
```

```
sapply(files, FUN = function(x){
```

```
  a <- read_csv(x) %>%  
    pull(2)
```

```
  a <- a[!is.na(a)]
```

```
  name <- str_replace_all(basename(x), ".csv", "_terms")
```

```
  assign(value = a,  
        x = name,  
        envir = .GlobalEnv)
```

```
})
```

```
# Create the function to construct dotplots
```

```
CreateDotplots <- function(results,  
                           terms,  
                           height = 14,  
                           width = 10,  
                           margin = c(0.5, 0.5, 0.5, 0.5),  
                           name){
```

```
  temp <- ck
```

```
  temp@compareClusterResult <- results %>%
```

```
    filter(p.adjust < 0.05) %>%
```

```
    filter(Description %in% terms)
```

```
  p <- dotplot(temp,
```

```
    showCategory = Inf,
```

```
    color = "NES",
```

```
    font.size = 14,
```

```
    label_format = 100) +
```

```
  scale_fill_gradient2(low = "blue",
```

```
    mid = "white",
```

```

        high = "red") +
theme(axis.text.x = element_text(angle = 0,
                                  hjust = 0.5,
                                  size = 12),
      axis.text.y = element_text(size = 14),
      plot.margin = unit(margin,
                          "inches")) +
xlab(NULL)

ggsave(paste0("./rnaseq_R_code/SETBP1/2024_02_05_FinaliseDotplots/Dotplots/", name, ".pdf"),
       p,
       height = height,
       width = width)

ggsave(paste0("./rnaseq_R_code/SETBP1/2024_02_05_FinaliseDotplots/Dotplots/", name, ".png"),
       p,
       height = height,
       width = width)
}

CreateDotplots(results = DGN_results,
               terms = DisGeNET_terms,
               name = "DGN_dotplot",
               margin = c(0.5, 0.25, 0.5, 0.25))

CreateDotplots(results = DO_results,
               terms = DO_terms,
               name = "DO_dotplot",
               margin = c(1.5, 1.9, 1.5, 1.9))

CreateDotplots(results = GO_BP_results,
               terms = GO_BP_terms,
               name = "GO_BP_dotplot",
               margin = c(0, 1.2, 0, 1.2))

CreateDotplots(results = GO_CC_results,
               terms = GO_CC_terms,
               name = "GO_CC_dotplot",
               margin = c(4, 2, 4, 2))

CreateDotplots(results = GO_MF_results,
               terms = GO_MF_terms,
               name = "GO_MF_dotplot",
               margin = c(3.7, 0.5, 3.7, 0.5))

```

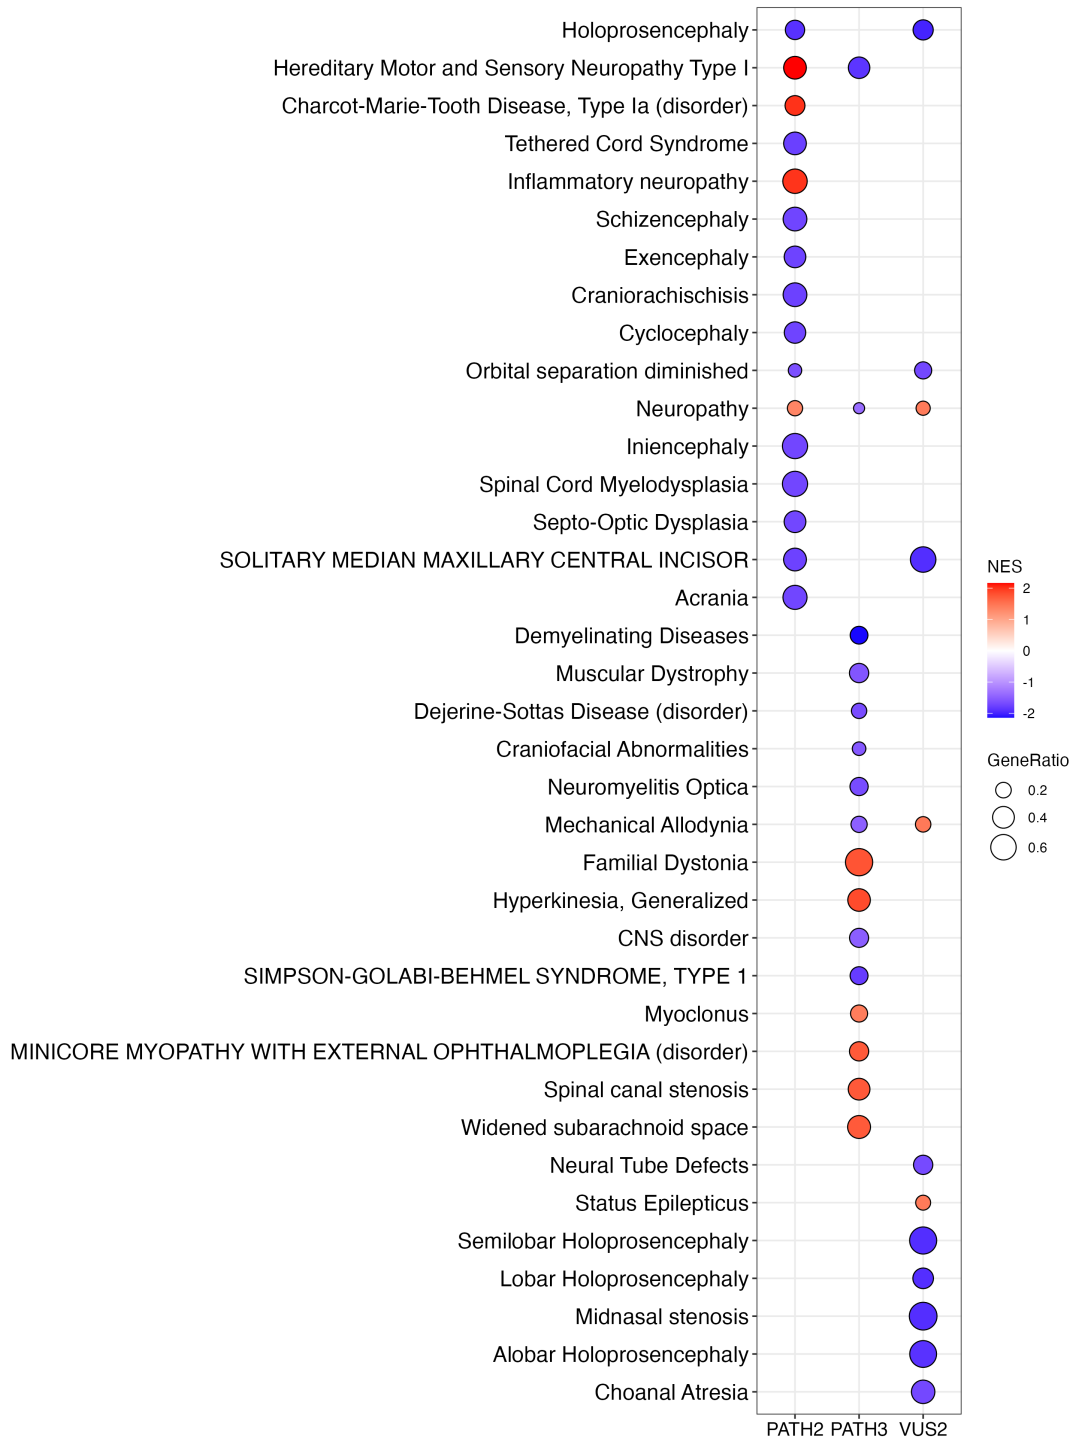



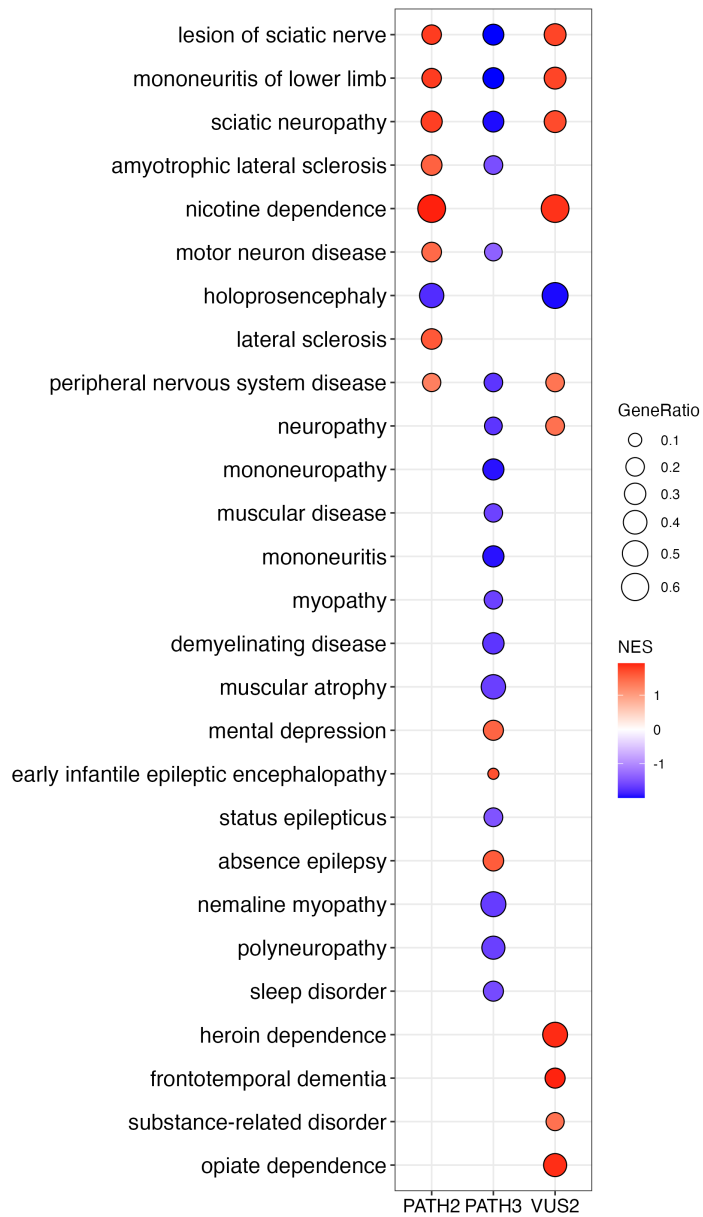

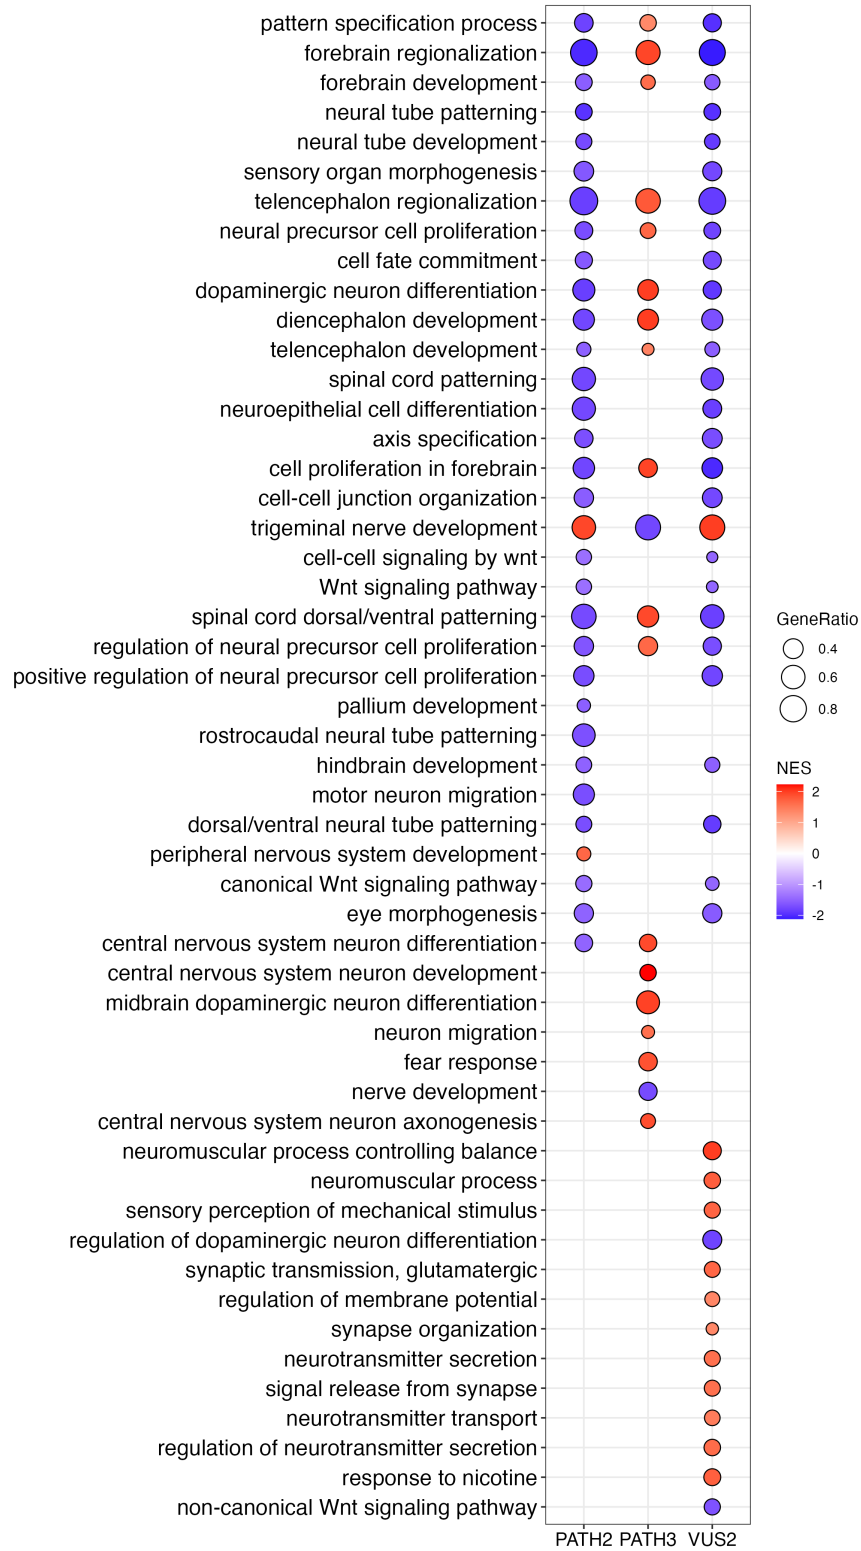

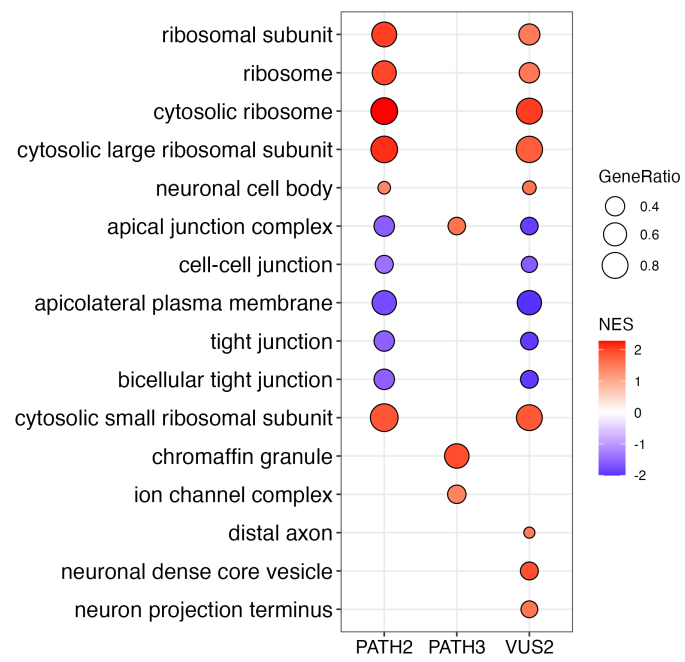

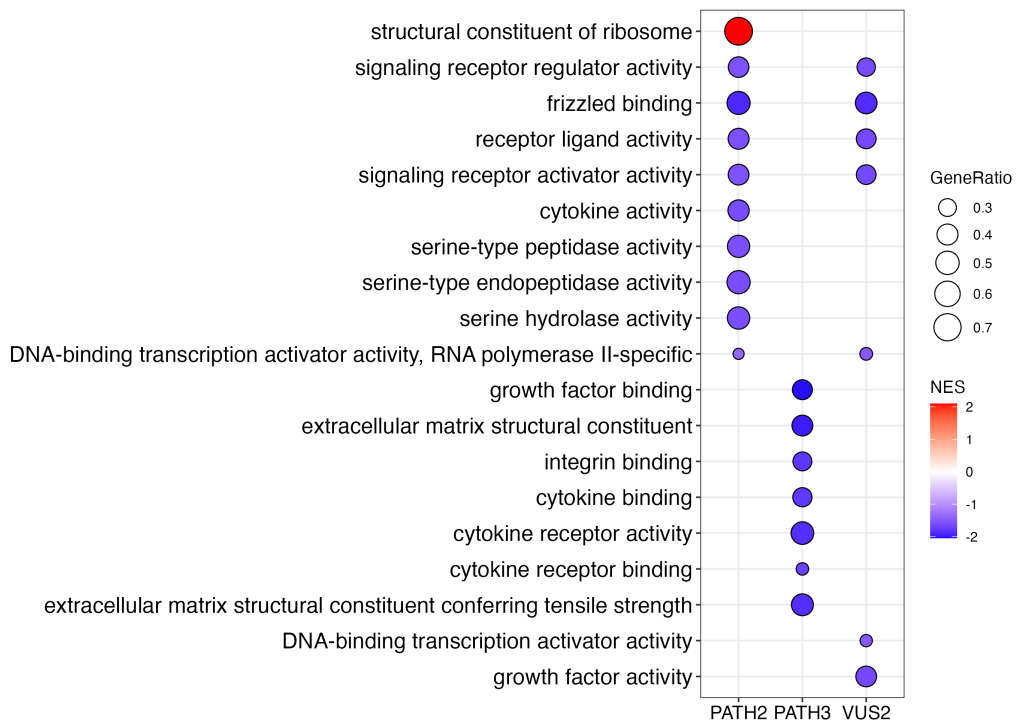

## 7 Construction of GSEA plots

The following section contains code to construct Figure 5(D-F), which are GSEA plots for specified terms. These plots depict the location of the genes in the ranked gene list.

```
# Prepare the list of terms for which a GSEA plot is to be constructed

files <- list.files(path = "./rnaseq_R_code/SETBP1/2023_11_30_GSEAPlots/TermRequests",
  pattern = ".csv",
  full.names = TRUE)
files <- files[2:6]

name <- paste0(c("DisGeNET",
  "DO",
  "GO_BP",
  "GO_CC",
  "GO_MF"), "_terms")

data <- data.frame(path = files,
  name = name)

sapply(1:nrow(data), function(x){

  file <- data[x, 1]
  name <- data[x, 2]

  temp <- read_csv(file,
    col_names = FALSE) %>%
    mutate(ontology = name)
  colnames(temp) <- c("ID", "Description", "Ontology")

  temp2 <- bind_rows(temp)
  str(temp2)

  assign(name,
    temp,
    envir = .GlobalEnv)

})

AllGSEA_terms <- bind_rows(GO_BP_terms,
  GO_MF_terms,
  GO_CC_terms,
  DisGeNET_terms,
  DO_terms)

Path2GO <- gseGO(geneList = GSEA.lists[[6]],
  ont = "all",
```

```

      OrgDb = org.Hs.eg.db,
      seed = 42)

Path3GO <- gseGO(geneList = GSEA.lists[[7]],
                ont = "all",
                OrgDb = org.Hs.eg.db,
                seed = 42)

VUSGO <- gseGO(geneList = GSEA.lists[[5]],
               ont = "all",
               OrgDb = org.Hs.eg.db,
               seed = 42)

Path2DO <- gseDO(geneList = GSEA.lists[[6]],
                 seed = 42)

Path3DO <- gseDO(geneList = GSEA.lists[[7]],
                 seed = 42)

VUSDO <- gseDO(geneList = GSEA.lists[[5]],
               seed = 42)

Path2DGN <- gseDGN(geneList = GSEA.lists[[6]],
                   seed = 42)

Path3DGN <- gseDGN(geneList = GSEA.lists[[7]],
                   seed = 42)

VUSDGN <- gseDGN(geneList = GSEA.lists[[5]],
                 seed = 42)

```

The below demonstrates the code used to generate the GSEA plots, of which only three were used for the paper. GSEA

*# Example for Molecular Function.*

```

sapply(1:nrow(GO_MF_terms), function(x){

  ID <- GO_MF_terms[[x, 1]]
  name <- GO_MF_terms[[x, 2]]
  name2 <- str_replace_all(GO_MF_terms[[x, 2]], "[ /]", "_")

  p1 <- gseaplot(x = Path2GO,
                 geneSetID = ID,
                 by = "runningScore",
                 title = paste0("PATH2 - ", name)) +
  xlab(NULL) +

```

```

ylab(NULL)

p2 <- gseaplot(x = Path3GO,
              geneSetID = ID,
              by = "runningScore",
              title = paste0("PATH3 - ", name)) +
  xlab(NULL) +
  theme(axis.title.y = element_text(size = 13))

p3 <- gseaplot(x = VUSGO,
              geneSetID = ID,
              by = "runningScore",
              title = paste0("VUS2 - ", name)) +
  ylab(NULL)

final_p <- wrap_plots(p1, p2, p3,
                    ncol = 1)

ggsave(paste0("./rnaseq_R_code/SETBP1/2023_11_30_GSEAPlots/GSEAPlots/GO_MF/", name2, "_GSEAPlot.",
              final_p)
})

```

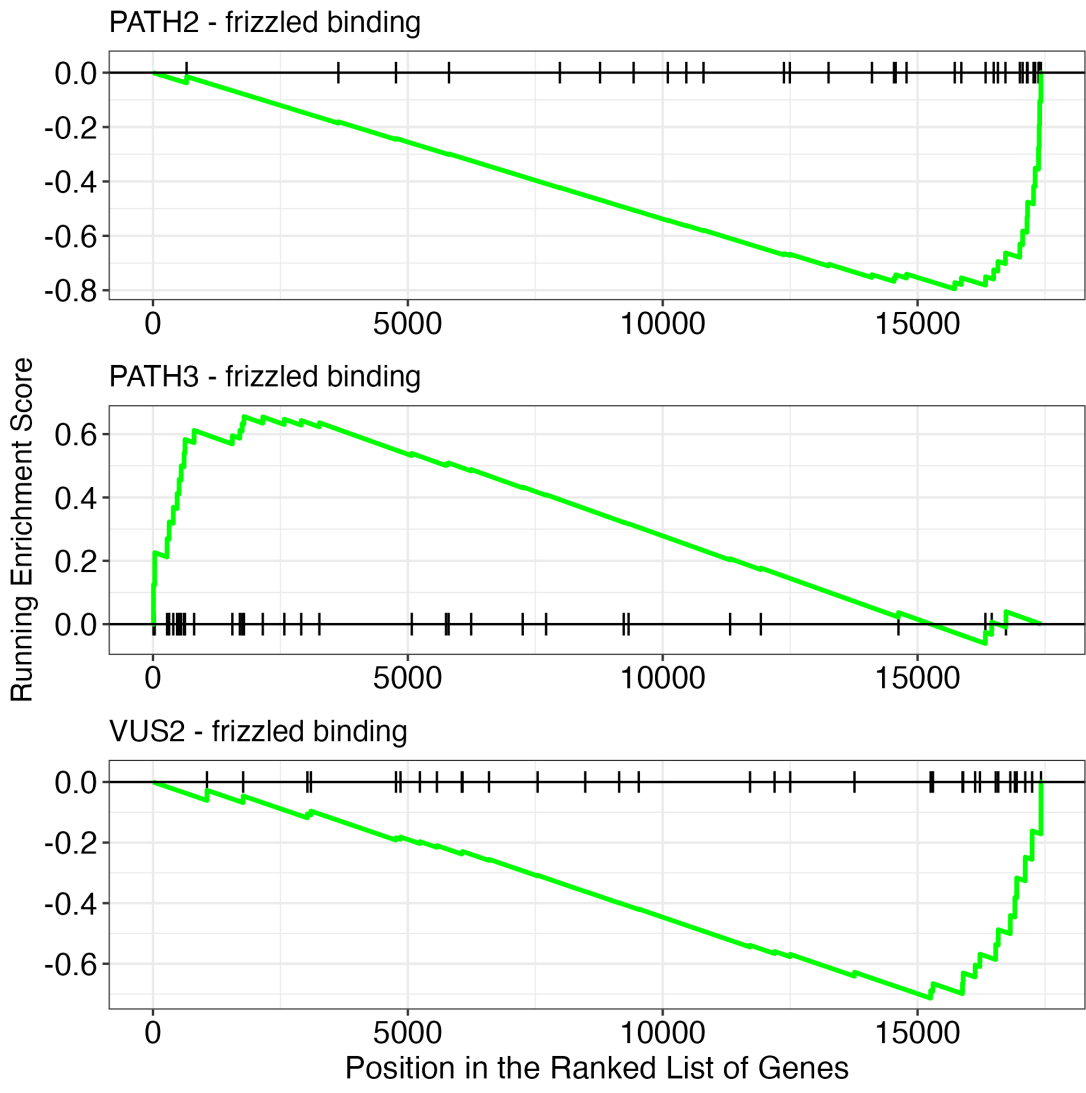



PATH2 - regulation of neural precursor cell proliferation

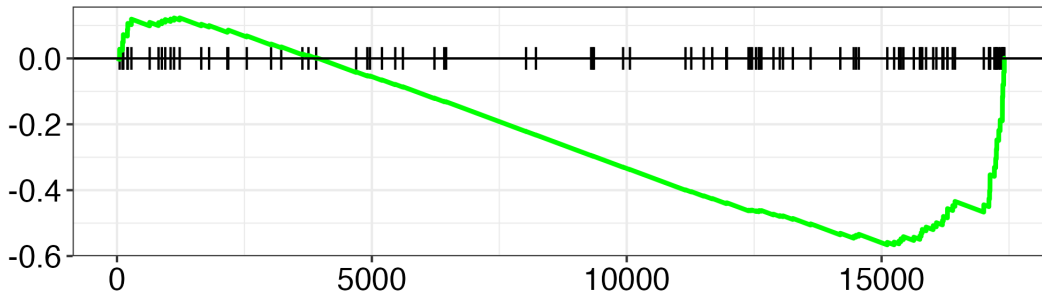

Running Enrichment Score

PATH3 - regulation of neural precursor cell proliferation

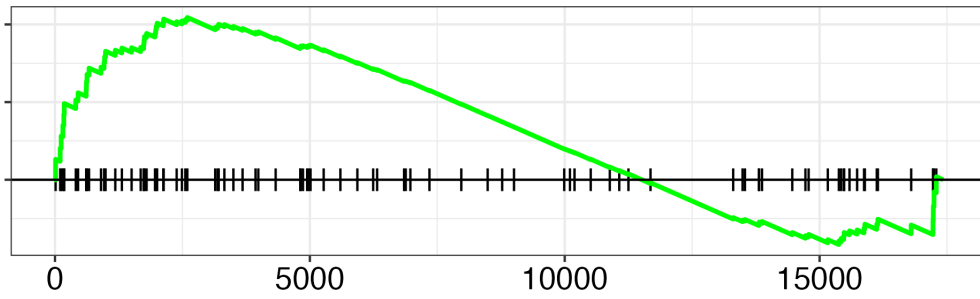

VUS2 - regulation of neural precursor cell proliferation

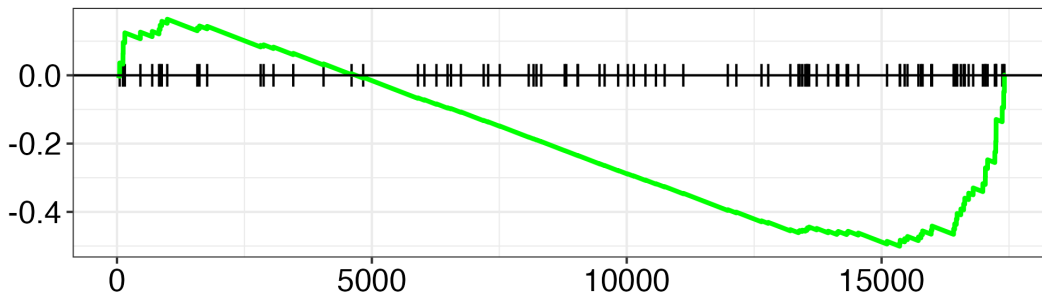

Position in the Ranked List of Genes

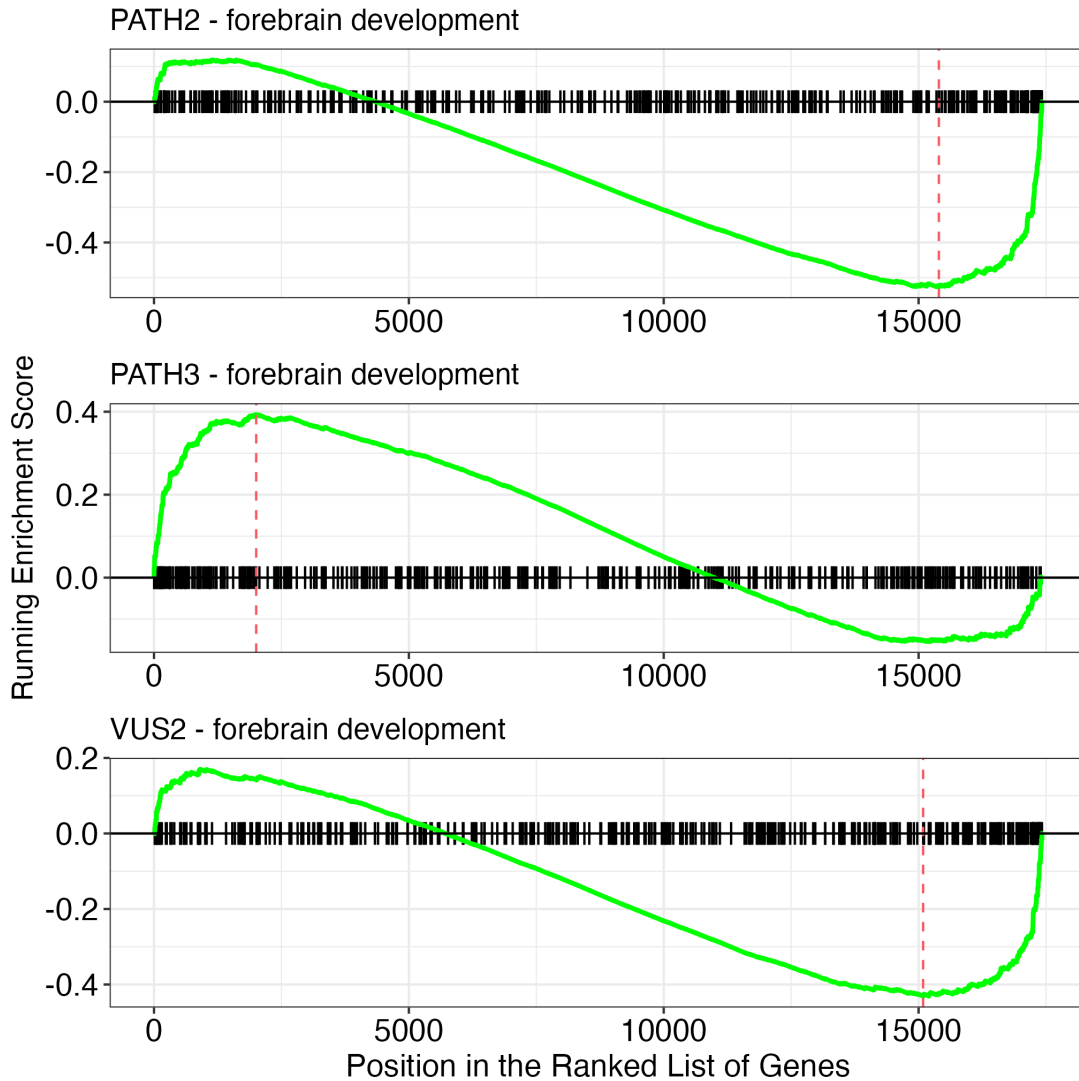

## 8 Session info

```
sessionInfo()
```

```
R version 4.3.2 (2023-10-31)
```

```
Platform: aarch64-apple-darwin23.0.0 (64-bit)
```

```
Running under: macOS Sonoma 14.0
```

```
Matrix products: default
```

```
BLAS: /opt/homebrew/Cellar/openblas/0.3.25/lib/libopenblas-r0.3.25.dylib
```

```
LAPACK: /opt/homebrew/Cellar/r/4.3.2/lib/R/lib/libRlapack.dylib; LAPACK version 3.11.0
```

```
locale:
```

```
[1] en_AU.UTF-8/en_AU.UTF-8/en_AU.UTF-8/C/en_AU.UTF-8/en_AU.UTF-8
```

time zone: Australia/Perth  
tzcode source: internal

attached base packages:

[1] stats4 stats graphics grDevices utils datasets methods  
[8] base

other attached packages:

[1] patchwork\_1.1.3 clusterProfiler\_4.8.2  
[3] enrichplot\_1.20.3 DOSE\_3.26.1  
[5] ComplexUpset\_1.3.3 viridis\_0.6.4  
[7] viridisLite\_0.4.2 org.Hs.eg.db\_3.18.0  
[9] AnnotationDbi\_1.64.1 IRanges\_2.36.0  
[11] S4Vectors\_0.40.2 Biobase\_2.62.0  
[13] BiocGenerics\_0.48.1 edgeR\_3.42.4  
[15] limma\_3.58.1 GGally\_2.2.0  
[17] lubridate\_1.9.3 forcats\_1.0.0  
[19] stringr\_1.5.1 dplyr\_1.1.4  
[21] purrr\_1.0.2 tidyr\_1.3.0  
[23] tibble\_3.2.1 tidyverse\_2.0.0  
[25] RColorBrewer\_1.1-3 readr\_2.1.4  
[27] tximport\_1.28.0 ggrepel\_0.9.4  
[29] ggplot2\_3.4.4 pacman\_0.5.1

loaded via a namespace (and not attached):

[1] DBI\_1.1.3 bitops\_1.0-7 shadowtext\_0.1.2  
[4] gson\_0.1.0 gridExtra\_2.3 rlang\_1.1.3  
[7] magrittr\_2.0.3 compiler\_4.3.2 RSQLite\_2.3.4  
[10] png\_0.1-8 vctrs\_0.6.5 reshape2\_1.4.4  
[13] pkgconfig\_2.0.3 crayon\_1.5.2 fastmap\_1.1.1  
[16] XVector\_0.42.0 ggraph\_2.1.0 utf8\_1.2.4  
[19] HDO.db\_0.99.1 tzdb\_0.4.0 bit\_4.0.5  
[22] zlibbioc\_1.48.0 cachem\_1.0.8 aplot\_0.2.2  
[25] GenomeInfoDb\_1.38.1 jsonlite\_1.8.8 blob\_1.2.4  
[28] BiocParallel\_1.36.0 tweenr\_2.0.2 parallel\_4.3.2  
[31] R6\_2.5.1 stringi\_1.8.3 GOSemSim\_2.28.0  
[34] Rcpp\_1.0.12 timechange\_0.2.0 Matrix\_1.6-3  
[37] splines\_4.3.2 igraph\_1.5.1 tidyselect\_1.2.0  
[40] qvalue\_2.32.0 codetools\_0.2-19 lattice\_0.21-9  
[43] plyr\_1.8.9 treeio\_1.26.0 withr\_2.5.2  
[46] KEGGREST\_1.42.0 gridGraphics\_0.5-1 ggstats\_0.5.1  
[49] scatterpie\_0.2.1 polyclip\_1.10-6 Biostrings\_2.70.1  
[52] pillar\_1.9.0 ggtree\_3.10.0 ggfun\_0.1.3  
[55] generics\_0.1.3 RCurl\_1.98-1.13 hms\_1.1.3  
[58] munsell\_0.5.0 scales\_1.3.0 tidytree\_0.4.5  
[61] glue\_1.7.0 lazyeval\_0.2.2 tools\_4.3.2  
[64] data.table\_1.14.10 locfit\_1.5-9.8 fgsea\_1.26.0  
[67] fs\_1.6.3 graphlayouts\_1.0.2 fastmatch\_1.1-4

|      |                         |                  |                   |
|------|-------------------------|------------------|-------------------|
| [70] | tidygraph_1.2.3         | cowplot_1.1.1    | grid_4.3.2        |
| [73] | ape_5.7-1               | colorspace_2.1-0 | nlme_3.1-163      |
| [76] | GenomeInfoDbData_1.2.11 | ggforce_0.4.1    | cli_3.6.2         |
| [79] | fansi_1.0.6             | gtable_0.3.4     | yulab.utils_0.1.1 |
| [82] | digest_0.6.34           | ggplotify_0.1.2  | farver_2.1.1      |
| [85] | memoise_2.0.1           | lifecycle_1.0.4  | httr_1.4.7        |
| [88] | statmod_1.5.0           | GO.db_3.17.0     | bit64_4.0.5       |
| [91] | MASS_7.3-60             |                  |                   |
